# Supplementary material for: The pan-cancer analysis identified DIAPH3 as a diagnostic biomarker of clinical cancer
Source: publisher site journal article supplement (doi:10.18632/aging.204459), 2023-01-05
Supplement: Supplementary file [file aging-v15i3-204459-supplementary-material-SD1.pdf]

## SUPPLEMENTARY FIGURE

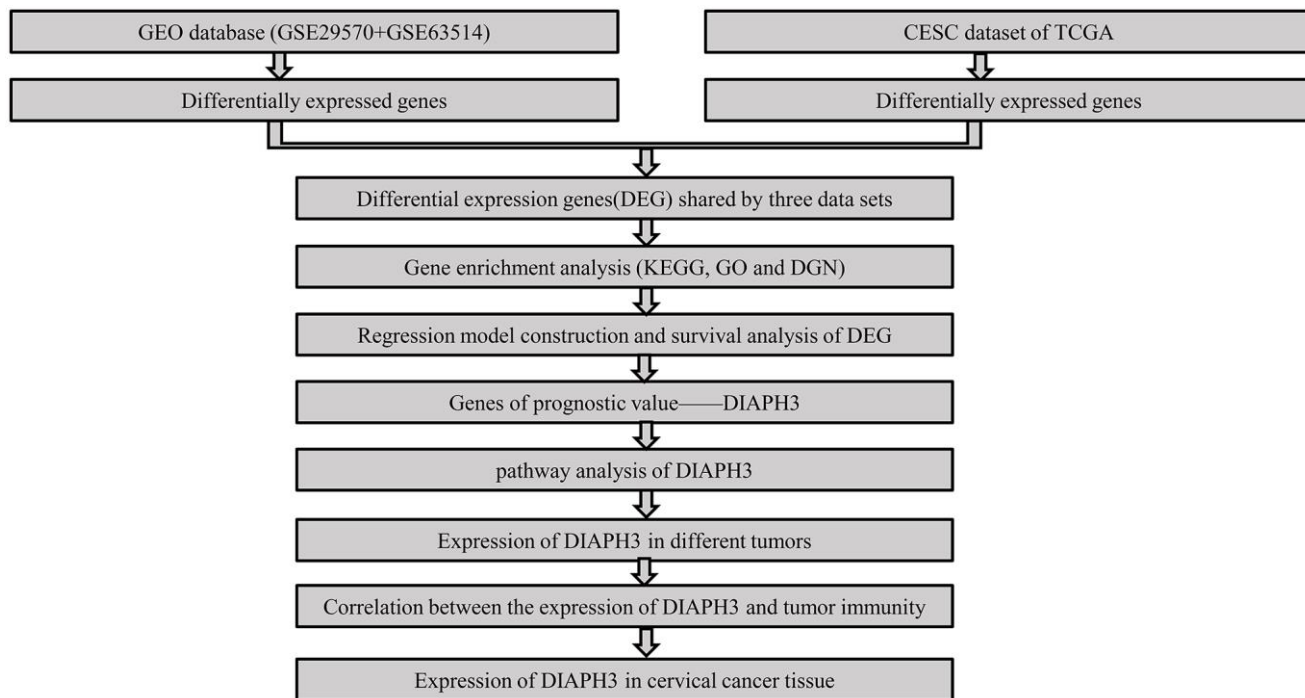

Supplementary Figure 1. Flowchart of pan cancer analysis using TAGA and GEO databases.
